# Supplementary material for: Rescue of multiple class II CFTR mutations by elexacaftor+tezacaftor+ivacaftor mediated in part by the dual activities of elexacaftor as both corrector and potentiator
Source: PubMed Central journal article supplement — Eur Respir J. 2021 Jun 17;57(6):2002774. doi: 10.1183/13993003.02774-2020 (PMC8209484; doi:10.1183/13993003.02774-2020), 2021-06-17
Supplement: ERJ-02774-2020.Shareable.pdf [file ERJ-02774-2020.Shareable.pdf]

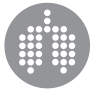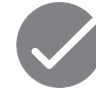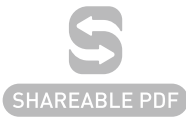

# Rescue of multiple class II CFTR mutations by elexacaftor+tezacaftor+ivacaftor mediated in part by the dual activities of elexacaftor as both corrector and potentiator

Onofrio Laselva <sup>1,2</sup>, Claire Bartlett<sup>3</sup>, Tarini N.A. Gunawardena<sup>1,3</sup>, Hong Ouyang<sup>3</sup>, Paul D.W. Eckford<sup>1</sup>, Theo J. Moraes<sup>3,4</sup>, Christine E. Bear<sup>1,2,5</sup> and Tanja Gonska<sup>3,4</sup>

**Affiliations:** <sup>1</sup>Programme in Molecular Medicine, The Hospital for Sick Children, Toronto, ON, Canada. <sup>2</sup>Dept of Physiology, University of Toronto, Toronto, ON, Canada. <sup>3</sup>Programme in Translational Medicine, The Hospital for Sick Children, Toronto, ON, Canada. <sup>4</sup>Dept of Paediatrics, University of Toronto, Toronto, ON, Canada. <sup>5</sup>Dept of Biochemistry, University of Toronto, Toronto, ON, Canada.

**Correspondence:** Tanja Gonska, Programme in Translational Medicine, The Hospital for Sick Children, Room 8415, 555 University Avenue, Toronto, ON M5G 8X4, Canada. E-mail: tanja.gonska@sickkids.ca

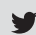

@ERSpublications

**Using pre-clinical studies of F508del in nasal cultures as a benchmark, this study identified other CF mutations for which Trikafta may be clinically effective** <https://bit.ly/3mbMOqL>

**Cite this article as:** Laselva O, Bartlett C, Gunawardena TNA, *et al.* Rescue of multiple class II CFTR mutations by elexacaftor+tezacaftor+ivacaftor mediated in part by the dual activities of elexacaftor as both corrector and potentiator. *Eur Respir J* 2021; 57: 2002774 [<https://doi.org/10.1183/13993003.02774-2020>].

This single-page version can be shared freely online.

**ABSTRACT** Positive results in pre-clinical studies of the triple combination of elexacaftor, tezacaftor and ivacaftor, performed in airway epithelial cell cultures obtained from patients harbouring the class II cystic fibrosis transmembrane conductance regulator (CFTR) mutation F508del-CFTR, translated to impressive clinical outcomes for subjects carrying this mutation in clinical trials and approval of Trikafta.

Encouraged by this correlation, we were prompted to evaluate the effect of the elexacaftor, tezacaftor and ivacaftor triple combination on primary nasal epithelial cultures obtained from individuals with rare class II CF-causing mutations (G85E, M1101K and N1303K) for which Trikafta is not approved.

Cultures from individuals homozygous for M1101K responded better than cultures harbouring G85E and N1303K after treatment with the triple combination with respect to improvement in regulated channel function and protein processing. A similar genotype-specific effect of the triple combination was observed when the different mutations were expressed in HEK293 cells, supporting the hypothesis that these modulators may act directly on the mutant proteins. Detailed studies in nasal cultures and HEK293 cells showed that the corrector, elexacaftor, exhibited dual activity as both corrector and potentiator, and suggested that the potentiator activity contributes to its pharmacological activity.

These pre-clinical studies using nasal epithelial cultures identified mutation genotypes for which elexacaftor, tezacaftor and ivacaftor may produce clinical responses that are comparable to, or inferior to, those observed for F508del-CFTR.
