# Supplementary material for: Rescue of multiple class II CFTR mutations by elexacaftor+tezacaftor+ivacaftor mediated in part by the dual activities of elexacaftor as both corrector and potentiator
Source: PubMed Central journal article supplement — Eur Respir J. 2021 Jun 17;57(6):2002774. doi: 10.1183/13993003.02774-2020 (PMC8209484; doi:10.1183/13993003.02774-2020), 2021-06-17
Supplement: ERJ-02774-2020.Supplement.pdf [file ERJ-02774-2020.Supplement.pdf]

# FIGURE S1

F508del/F508del

**A**

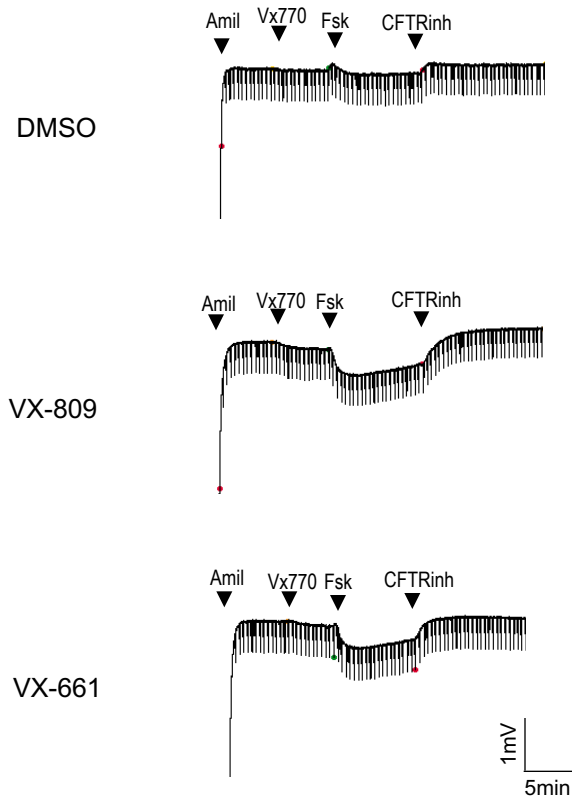

**B**

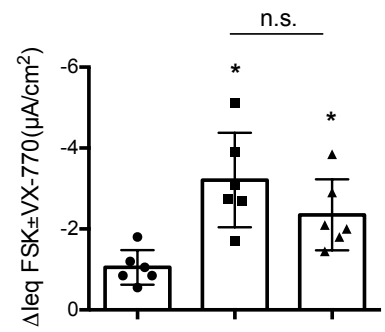

**C**

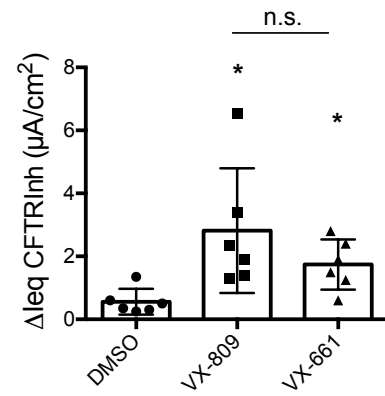

**FIGURE S1: ORKAMBI and SYMDEKO showed similar rescue of F508del-CFTR in nasal epithelial cultures derived from 6 patients homozygous for F508del/F508del. (A)** Representative tracing show Ussing chamber studies measurements of CFTR function in nasal epithelial cell cultures from F508del/F508del patients after pre-treatment with DMSO, VX-809 (3  $\mu$ M) or VX-661 (3  $\mu$ M). **(B)** Bar graphs showing the mean ( $\pm$ SD) of maximal response  $I_{eq}$  ( $\mu$ A/cm<sup>2</sup>) after stimulation with forskolin (10  $\mu$ M) + VX-770 (1  $\mu$ M) (2 inserts for each treatment). **(C)** Bar graphs showing the  $I_{eqCFTR_{inh-172}}$  ( $\mu$ A/cm<sup>2</sup>) by CFTR<sub>inh-172</sub> (10  $\mu$ M). Comparative analysis was performed using by one-way ANOVA followed by Turkey's post-hoc test. \* $p$ <0.05.

# FIGURE S2

**A**

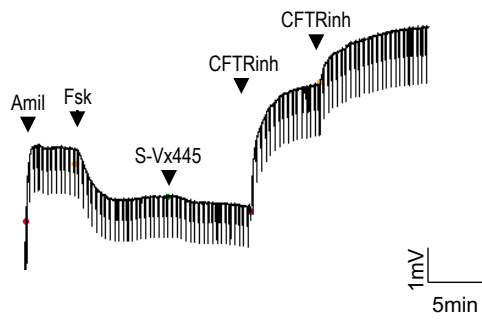

**B**

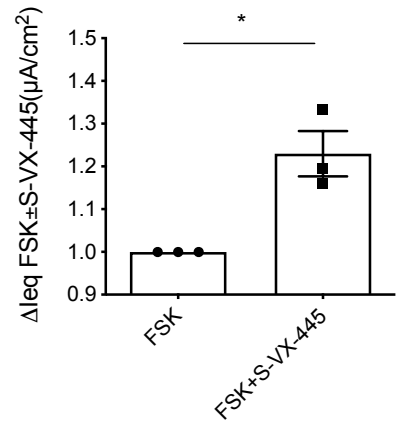

**FIGURE S2: VX-445 compound increased channel activation of Wt-CFTR in nasal epithelial cells.** (A) Representative trace showing Ussing chamber measurements of CFTR function in nasal epithelial cell cultures from a non-CF donor. (B) Bar graphs showing the fold increased forskolin (0.1  $\mu$ M) + [S]-VX-445 (3  $\mu$ M) activated  $\Delta I_{eq}$  compared to forskolin (0.1  $\mu$ M) control in 3 technical replicated nasal epithelial cells generated from 1 healthy control. \* $p < 0.05$ .

# FIGURE S3

**A**

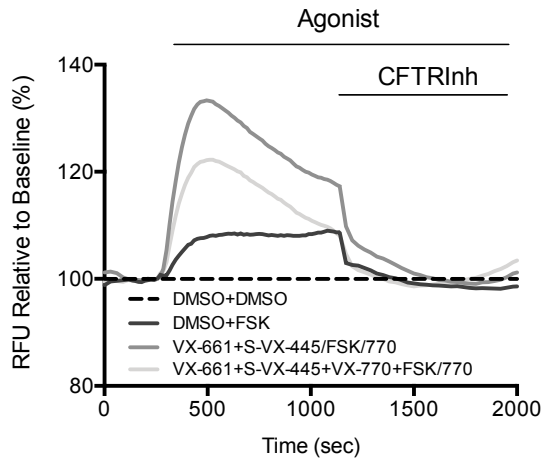

**B**

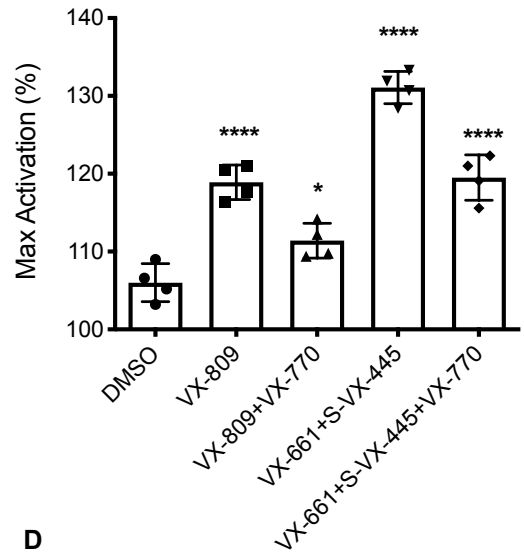

**C**

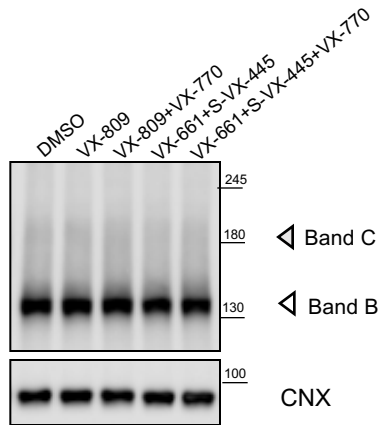

**D**

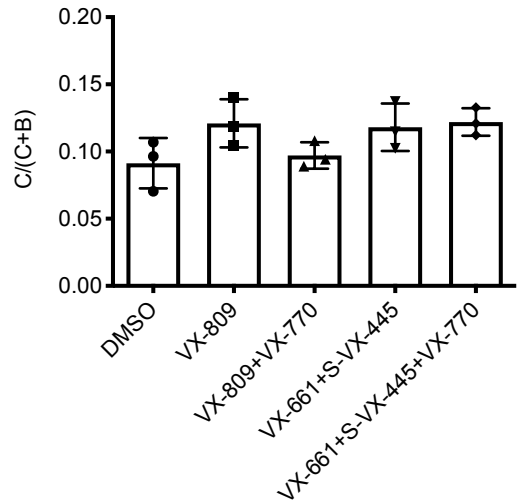

**FIGURE S3: VX-445+ VX-661+ VX-770 showed functional rescue of N1303K-CFTR in CFF 16HBEge CFTR-N1303K.** (A) Representative traces of N1303K-CFTR-dependent chloride efflux by FLIPR assay in HBE cells pre-treated with DMSO, VX-809 (3  $\mu$ M), [S]-VX-445 (3  $\mu$ M)+ VX-661 (3  $\mu$ M), VX-661 (3  $\mu$ M)+ VX-770 (1  $\mu$ M) or [S]-VX-445 (3  $\mu$ M)+ VX-661 (3  $\mu$ M)+ VX-770 (1  $\mu$ M) for 24 hrs at 37°C. (B) Bar graphs show the mean ( $\pm$ SD) of maximal activation of N1303K-CFTR after stimulation by FSK (10  $\mu$ M) +/- VX-770 (1  $\mu$ M) (n= 4 biological replicates and 4 technical replicates for each experiment) \*p<0.05; \*\*\*\*p<0.0001 by one way ANOVA followed by Turkey's post-hoc test.

# FIGURE S4

Y569D/Y569D

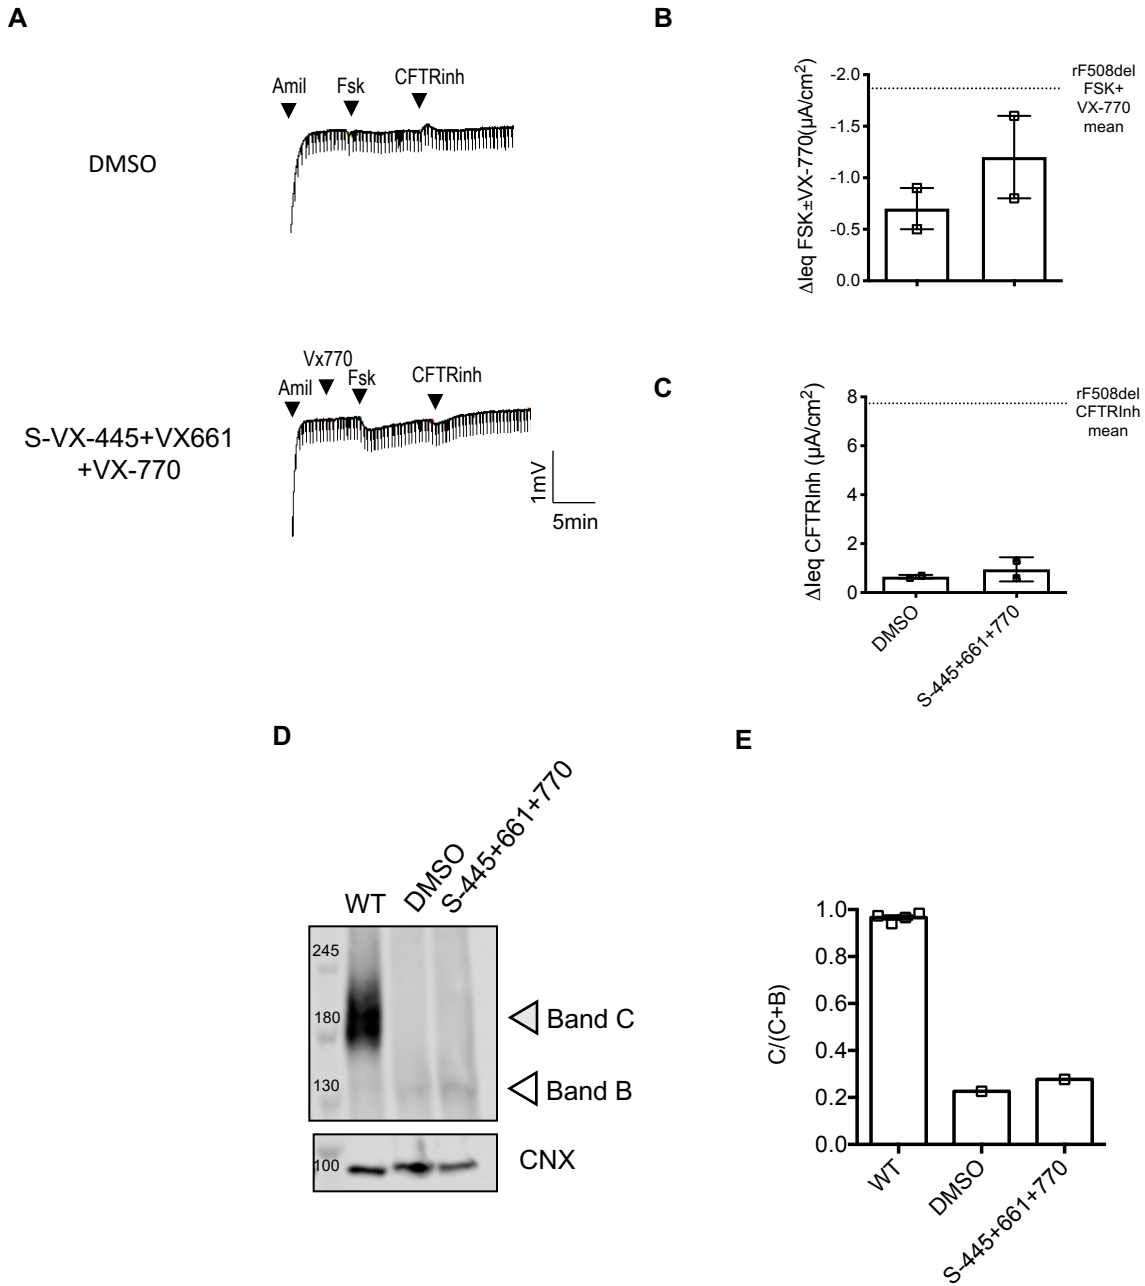

**FIGURE S4: VX-445+ VX-661+ VX-770 failed to rescue Y569D-CFTR channel activity in nasal epithelial cultures derived from 1 patient homozygous for Y569D/Y569D.** (A) Representative tracings show Ussing chamber measurements of CFTR function in nasal epithelial cell cultures from 1 CF patient bearing Y596D/Y569D in the absence or presence of the [S]-VX-445+ VX-661+ VX-770. (B) Bar graphs showing the mean ( $\pm$ SD) of maximal response  $I_{eq}$  ( $\mu$ A/cm<sup>2</sup>) after stimulation by forskolin (10  $\mu$ M) +/- VX-770 (1  $\mu$ M) for nasal cultures from 1 patient bearing Y596D/Y569D after pre-treatment (48 hrs at 37°C) with DMSO (0.1%) or [S]-VX-445 (3  $\mu$ M)+ VX-661 (3  $\mu$ M)+ VX-770 (1  $\mu$ M) (2 inserts for each treatment). (C) Bar graphs showing the  $I_{eq}$ CFTR inhibition ( $\mu$ A/cm<sup>2</sup>) by CFTR<sub>Inh-172</sub> (10  $\mu$ M) (2 inserts for each treatment). (D) Immunoblots of steady-state expression of Wt or Y596D/Y569D following treatments with CFTR modulators. Band C: mature, complex-glycosylated CFTR; Band B: immature, core-glycosylated CFTR; CNX: Calnexin. (E) Bars represent the ratio of band C/(band C+ band B) (n=2). Statistical analysis was performed using paired two-tailed Student's t-test.



# FIGURE S5

**A**

G542X/N1303K

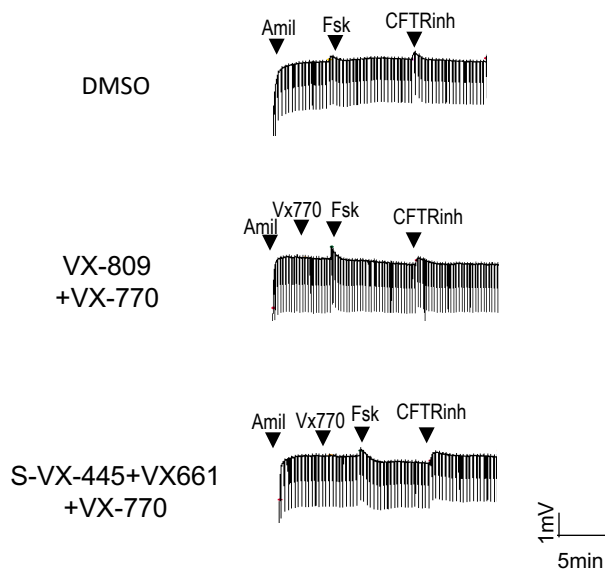

**B**

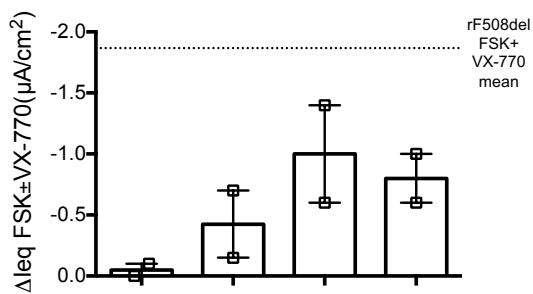

**C**

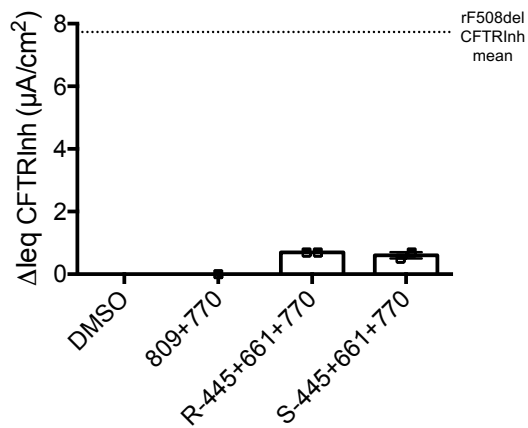

**D**

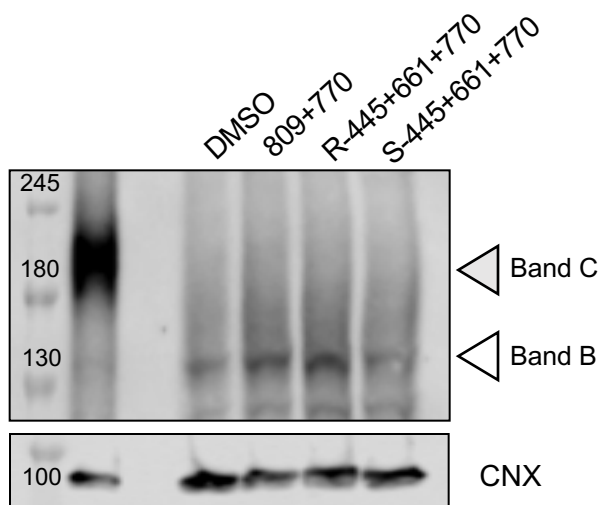

**E**

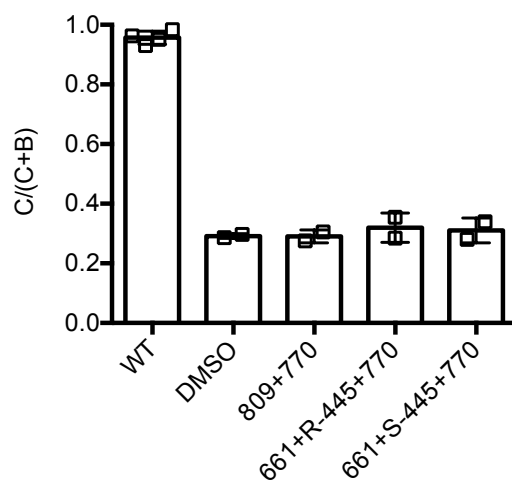

**FIGURE S5: VX-445+ VX-661+ VX-770 showed minimal increase in CFTR activity in nasal epithelial cultures derived from patients with G542X/N1303K mutation (n=2).** (A) Representative tracings show Ussing chamber measurements of CFTR function in nasal epithelial cell cultures from a CF patient bearing G542X/N1303K in the absence or presence of the small molecule corrector. (B) Bar graphs showing the mean ( $\pm$ SD) of maximal response  $I_{eq}$  ( $\mu$ A/cm<sup>2</sup>) after stimulation by forskolin (10  $\mu$ M) +/- VX-770 (1  $\mu$ M) of 1-2 technical replicates of nasal epithelial cell cultures generated from 2 patients bearing G542X/N1303K. Nasal epithelial cells were treated (48h at 37°C) with DMSO (0.1%), VX-809 (3  $\mu$ M)+ VX-770 (1  $\mu$ M), R-VX-445 (3  $\mu$ M)+ VX-661 (3  $\mu$ M)+ VX-770 (1  $\mu$ M) or [S]-VX-445 (3  $\mu$ M)+ VX-661 (3  $\mu$ M)+ VX-770 (1  $\mu$ M) (2-3 inserts for each treatment). (C) Bar graphs showing the mean ( $\pm$ SD)  $I_{eq}CFTR_{inh-172}$  ( $\mu$ A/cm<sup>2</sup>) by  $CFTR_{Inh-172}$  (10  $\mu$ M). (D) Immunoblots of steady-state expression of G542X/N1303K following treatments with CFTR modulators. Band C: mature, complex-glycosylated CFTR; Band B: immature, core-glycosylated CFTR; CNX: Calnexin. (E) Bars represent the mean ( $\pm$ SD) of the ratio band C/(band C+ band B) (n=2). Statistical analysis was performed using one-way ANOVA followed by Turkey's post-hoc test.
